# Supplementary material
Source: PubMed Central journal article supplement (PMC4198363)
Supplement: auto-10-1787-s01.pdf [file auto-10-1787-s01.pdf]

## **Supplemental Material to:**

**Yu-Han Huang, Abdul Qader O Al-aidaroos,  
Hiu-Fung Yuen, Shu-Dong Zhang, Han-Ming Shen,  
Ewelina Rozycka, Cian M McCrudden, Vinay Tergaonkar,  
Abhishek Gupta, You Bin Lin, Jean Paul Thiery,  
James T Murray and Qi Zeng**

**A role of autophagy in PTP4A3-driven cancer progression**

**Autophagy 2014; 10(10)**

**<http://dx.doi.org/10.4161/auto.29989>**

**[www.landesbioscience.com/journals/autophagy/article/29989](http://www.landesbioscience.com/journals/autophagy/article/29989)**

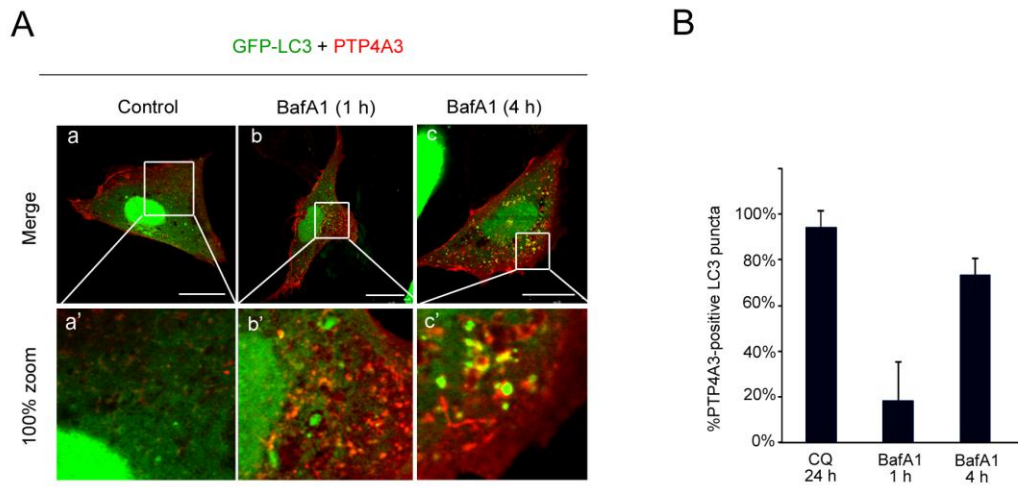

**Figure S1.** PTP4A3 colocalizes with LC3 puncta in BafA1-treated CHO-PTP4A3. **(A)** CHO-PTP4A3 cells transiently overexpressing EGFP-LC3B (green) were treated with BafA1 and immunolabeled with anti-PTP4A3 antibody (red). Bar: 20  $\mu$ m. **(B)** Quantification of PTP4A3 and EGFP-LC3B colocalization shown as percentage of LC3 puncta positive for PTP4A3 (n = x).

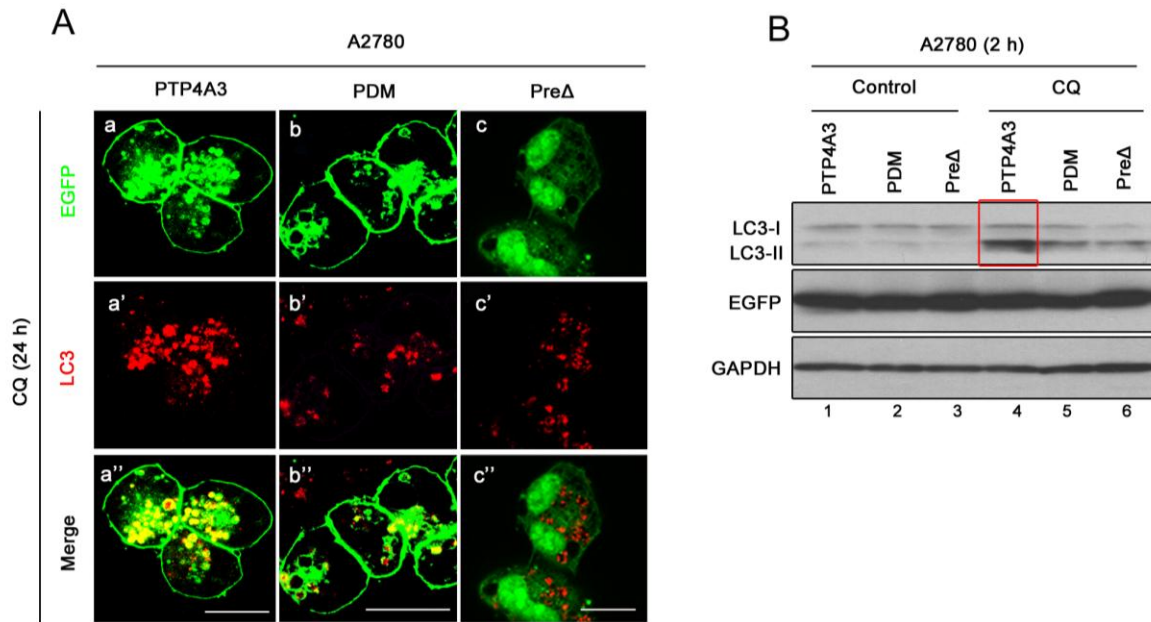

**Figure S2.** PDM, but not PreΔ, colocalizes with LC3 puncta upon CQ treatment, but neither PDM nor PreΔ could promote LC3 conversion compared to PTP4A3. **(A)** A2780 cells overexpressing EGFP-PTP4A3, EGFP-PTP4A3-PDM or EGFP-PTP4A3-PreΔ (prenylation mutant) were treated with CQ (50 μM) for 24 h. Endogenous LC3 was then immunolabeled with an anti-LC3 antibody. Bar: 15 μm. **(B)** Cells in **(A)** were untreated (control) or treated with CQ (50 μM) for 2 h. LC3 and EGFP levels were then analyzed by western blotting. GAPDH served as loading control.

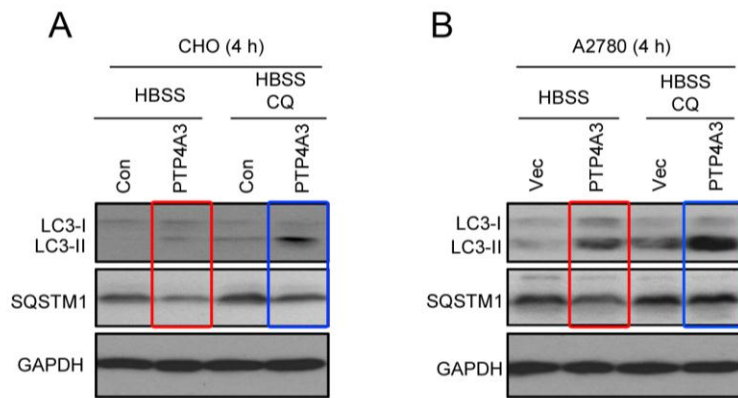

**Figure S3.** PTP4A3 promotes both LC3-I to LC3-II conversion and SQSTM1 degradation under HBSS starvation. **(A)** CHO-Con and CHO-PTP4A3 cells were treated as indicated before lysis for western blotting analysis. **(B)** A2780-Vec and A2780-PTP4A3 cells were treated as indicated before lysis for western blotting analysis.

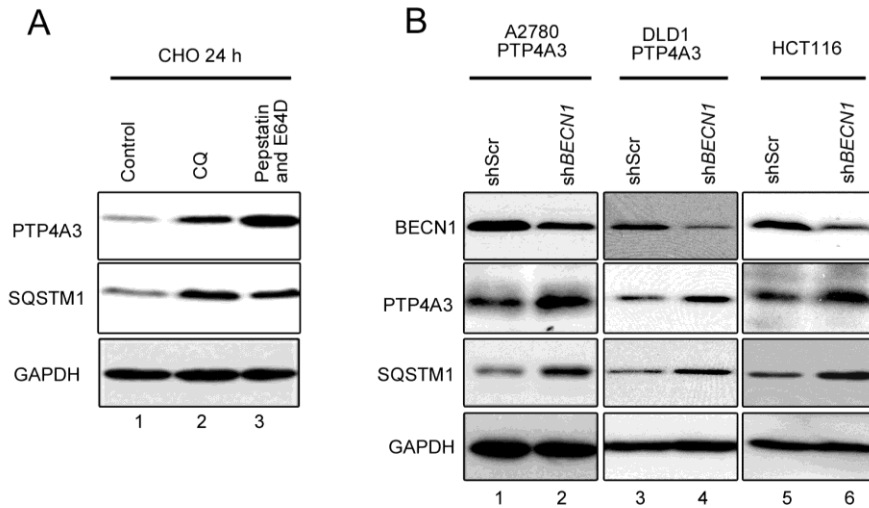

**Figure S4.** PTP4A3 protein accumulates in cells treated with pepstatin and E64D or upon *BECN1* knockdown. **(A)** CHO-PTP4A3 cells were untreated (Control), or treated with either CQ (50  $\mu$ M) or pepstatin and E64D (final 10  $\mu$ g/mL each) for 24 h. PTP4A3 and SQSTM1 expression levels were then analyzed by western blotting, and GAPDH served as a loading control. **(B)** *BECN1* was knocked down using shRNA in A2780-PTP4A3, DLD1-PTP4A3 and HCT116 cells. Exponentially growing cells in full media were lysed for western blotting analysis with the indicated antibodies. GAPDH served as loading control.

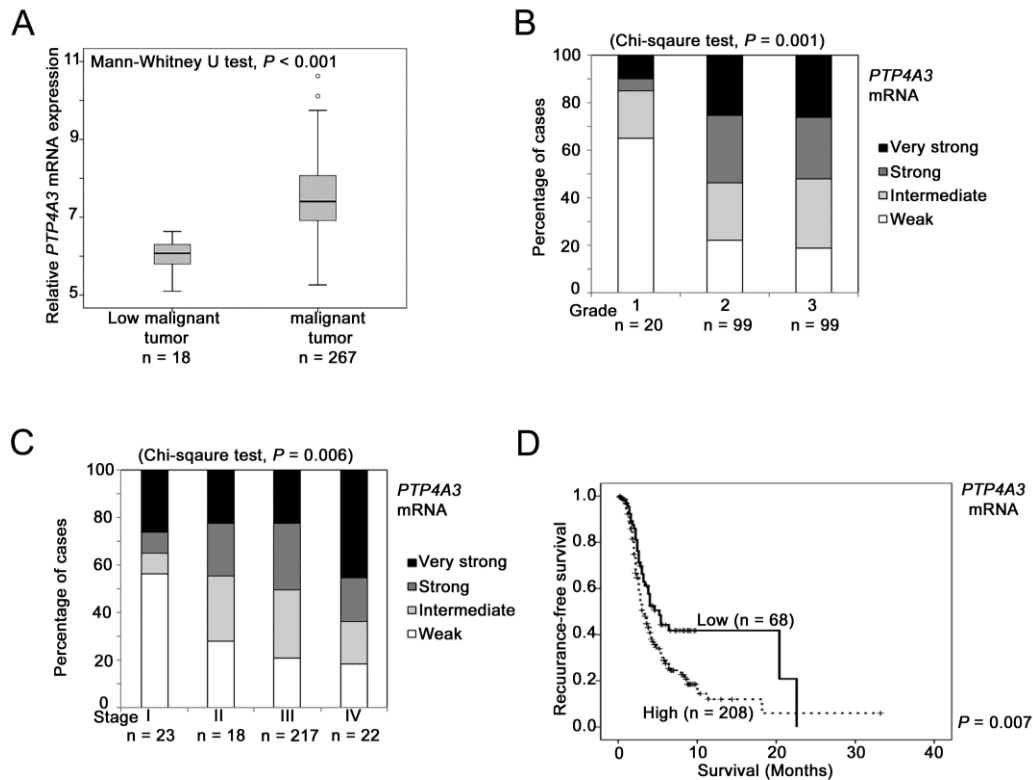

**Figure S5.** High *PTP4A3* mRNA expression is significantly associated with advanced tumor grade, late tumor stage and poor survival in the GSE9899 ovarian cancer cohort. **(A)** *PTP4A3* mRNA expression level was significantly higher in patients with malignant ovarian tumors compared to those with low malignant potential tumors. **(B and C)** *PTP4A3* mRNA expression was significantly higher in tumors with higher tumor grades **(B)** and stage **(C)**. **(D)** A high level of *PTP4A3* mRNA expression was significantly associated with a shorter recurrence-free survival time of ovarian cancer patients.

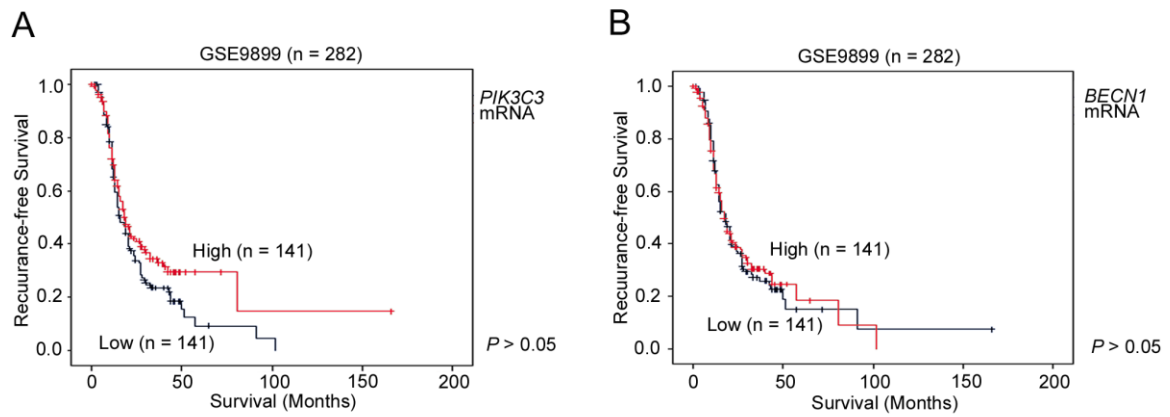

**Figure S6.** Autophagy genes alone have no prognostic value for recurrence-free ovarian cancer survival in the GSE9899 patient cohort. No significant prognostic value was observed for stratified **(A)** *PIK3C3* or **(B)** *BECN1* mRNA expression.

Low *PIK3C3* mRNA (GSE9899)

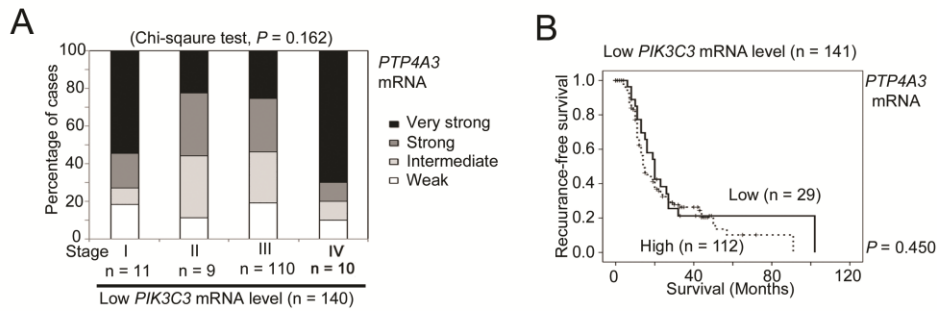

Low *BECN1* mRNA (GSE9899)

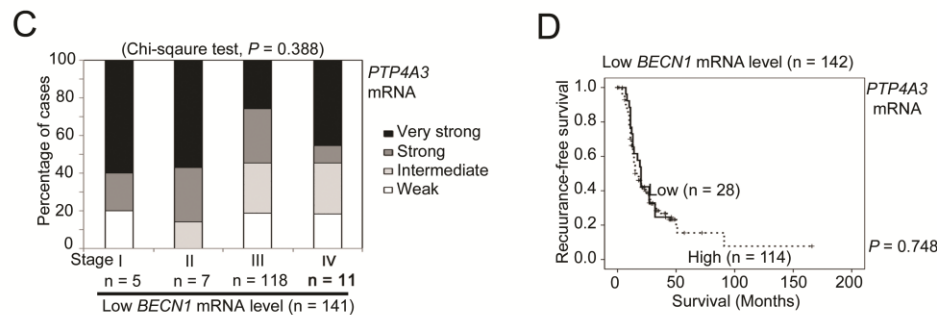

**Figure S7.** Low levels of autophagy genes and *PTP4A3* expression levels in ovarian cancer cohort (GSE9899). **(A)** In ovarian cancer patients expressing low levels of *PIK3C3*, *PTP4A3* expression levels were not significantly correlated with higher pathological stage. **(B)** No significant correlation between *PTP4A3* expression and recurrence-free survival in patients with low *PIK3C3* expression levels. **(C and D)** Similar results as in **(A and B)** were obtained when the tumors were stratified by *BECN1* instead of *PIK3C3*.
